# Supplementary material for: Frequency and Predictors of Relapses following SARS-CoV-2 Vaccination in Patients with Multiple Sclerosis: Interim Results from a Longitudinal Observational Study
Source: MDPI journal article supplement (doi:10.3390/jcm12113640), 2023-05-24
Supplement: s1 [file s1]

**Supplementary Table S3. Reference registry cohort of vaccinated MS patients (N=615)**

|                                                                                               |                  |
|-----------------------------------------------------------------------------------------------|------------------|
| <b>Gender, N (%)</b>                                                                          |                  |
| Female                                                                                        | 460 (74.8)       |
| Male                                                                                          | 155 (25.2)       |
| <b>Age at MS onset [years], median (range)</b>                                                | 30.2 (23.2–38.9) |
| <b>Disease duration [years], median (range)</b>                                               | 12.3 (6.4–19.6)  |
| <b>Time to diagnosis [years], median (range)</b>                                              | 0.2 (0.0–1.9)    |
| <b>MS disease course, N (%)</b>                                                               |                  |
| RRMS                                                                                          | 555 (90.2)       |
| SPMS                                                                                          | 60 (9.8)         |
| <b>Disability level (EDSS), N (%)</b>                                                         |                  |
| Mild (0–2.5)                                                                                  | 371 (60.3)       |
| Moderate (3.0–5.5)                                                                            | 168 (27.3)       |
| Severe (≥6.0)                                                                                 | 76 (12.4)        |
| <b>DMD treatment, N (%)</b>                                                                   |                  |
| High-efficacy DMD                                                                             | 374 (60.8)       |
| Mild-moderate-efficacy DMD                                                                    | 185 (30.1)       |
| Other DMD                                                                                     | 3 (0.5)          |
| DMD-untreated                                                                                 | 53 (8.6)         |
| <b>Relapse within the year prior to X<sup>1</sup>, N (%)</b>                                  | 50 (8.1)         |
| <b>Time from last relapse (before X<sup>1</sup>) to X<sup>1</sup> [years], median (range)</b> | 2.1 (1.0–3.3)    |

DMD – disease-modifying drug

EDSS – expanded disability status scale

MS – multiple sclerosis

N – number of patients

RRMS – relapsing remitting MS

SPMS – secondary progressive MS

X<sup>1</sup> – first SARS-CoV-2 vaccination
