# Supplementary material for: Frequency and Predictors of Relapses following SARS-CoV-2 Vaccination in Patients with Multiple Sclerosis: Interim Results from a Longitudinal Observational Study
Source: MDPI journal article supplement (doi:10.3390/jcm12113640), 2023-05-24
Supplement: s1 [file s1]

**Supplementary Table S2. Matched pre-pandemic reference registry cohort from 2020 (N=2182)**

|                                                  |                  |
|--------------------------------------------------|------------------|
| <b>Gender, N (%)</b>                             |                  |
| Female                                           | 1724 (79.0)      |
| Male                                             | 458 (21.0)       |
| <b>Age at MS onset [years], median (range)</b>   | 30.0 (24.0–37.3) |
| <b>Disease duration [years], median (range)</b>  | 13.3 (6.8–21.3)  |
| <b>Time to diagnosis [years], median (range)</b> | 0.3 (0.0–2.2)    |
| <b>MS disease course, N (%)</b>                  |                  |
| RRMS                                             | 1773 (81.3)      |
| SPMS                                             | 409 (18.7)       |
| <b>Disability level (EDSS), N (%)</b>            |                  |
| Mild (0–2.5)                                     | 1168 (53.5)      |
| Moderate (3.0–5.5)                               | 730 (33.5)       |
| Severe (≥6.0)                                    | 284 (13.0)       |
| <b>DMD treatment, N (%)</b>                      |                  |
| High-efficacy DMD                                | 659 (30.2)       |
| Mild-moderate-efficacy DMD                       | 960 (44.0)       |
| DMD-untreated                                    | 563 (25.8)       |

DMD – disease-modifying drug

EDSS – expanded disability status scale

MS – multiple sclerosis

N – number of patients

RRMS – relapsing remitting MS

SPMS – secondary progressive MS
