# Supplementary material for: Frequency and Predictors of Relapses following SARS-CoV-2 Vaccination in Patients with Multiple Sclerosis: Interim Results from a Longitudinal Observational Study
Source: MDPI journal article supplement (doi:10.3390/jcm12113640), 2023-05-24
Supplement: s1 [file s1]

## Supplementary Document S1. Baseline questionnaire

|                                                                |                                                                                                                                    |                                                                                                                                |        |
|----------------------------------------------------------------|------------------------------------------------------------------------------------------------------------------------------------|--------------------------------------------------------------------------------------------------------------------------------|--------|
| Gender:                                                        | Male                                                                                                                               | Female                                                                                                                         | Divers |
| Birth date:                                                    | __-__ (MM.JJJJ)                                                                                                                    |                                                                                                                                |        |
| Please indicate the federal state in which you currently live: | Baden-Wuerttemberg<br>Berlin<br>Bremen<br>Hesse<br>Lower Saxony<br>Rhineland-Palatinate<br>Saxony<br>Schleswig-Holstein<br>Bavaria | Brandenburg<br>Hamburg<br>Mecklenburg-Western<br>Pomerania<br>North Rhine-Westphalia<br>Saarland<br>Saxony-Anhalt<br>Thuringia |        |

### MS diagnosis

|                                         |                                                                                                                                                                                                                                                                                                                                                                                                                                                                                                                                                                                                                                                                                                                                                                                                                                                                                                              |
|-----------------------------------------|--------------------------------------------------------------------------------------------------------------------------------------------------------------------------------------------------------------------------------------------------------------------------------------------------------------------------------------------------------------------------------------------------------------------------------------------------------------------------------------------------------------------------------------------------------------------------------------------------------------------------------------------------------------------------------------------------------------------------------------------------------------------------------------------------------------------------------------------------------------------------------------------------------------|
| Date of first symptoms:                 | __-__ (MM.JJJJ)                                                                                                                                                                                                                                                                                                                                                                                                                                                                                                                                                                                                                                                                                                                                                                                                                                                                                              |
| Date of diagnosis                       | __-__ (MM.JJJJ)                                                                                                                                                                                                                                                                                                                                                                                                                                                                                                                                                                                                                                                                                                                                                                                                                                                                                              |
| Please indicate your MS disease course: | <p><b>Relapsing-remitting</b><br/>         In the relapsing-remitting course, sudden impairments occur that can last for a few days or weeks (so-called relapses). There can be weeks or months between the individual relapses. Relapsing-remitting means that the impairments become weaker or can disappear completely.</p> 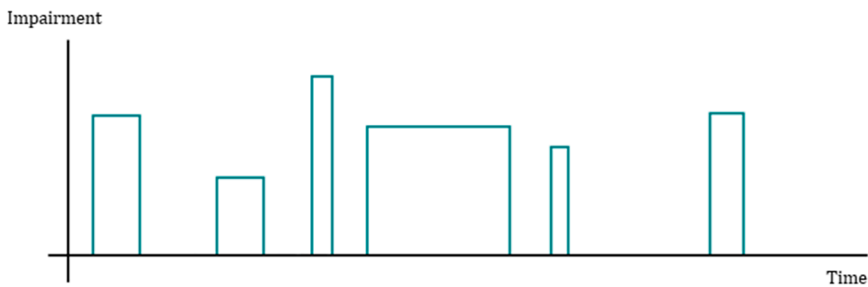 <p><b>Secondary progressive</b><br/>         The secondary progressive course usually follows relapsing-remitting MS and is characterised by a decrease in the frequency of relapses (which may not occur at all), as well as a gradual worsening of disability.</p>  <p><b>Primary progressive</b><br/>         In the primary chronic-progressive course, the impairment constantly increases.</p> |

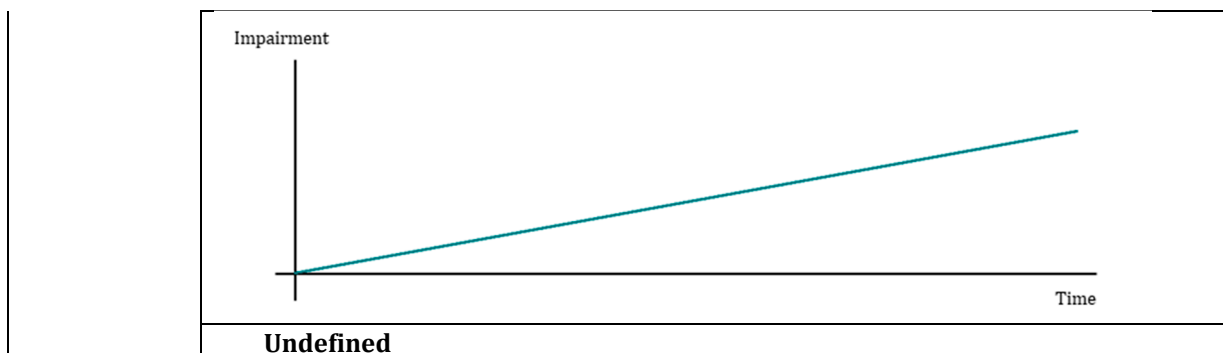

### Patient-determined disease steps (PDDS)

Please read the choices below and choose the one that describes your own situation most appropriately.

This scale focuses mainly on how well you can **walk**.

*You may not find a description that accurately reflects your condition, but please mark the category that describes your situation most closely.*

|                                                                                                                                                                                                                                                                                                                                                                                                                                 |  |
|---------------------------------------------------------------------------------------------------------------------------------------------------------------------------------------------------------------------------------------------------------------------------------------------------------------------------------------------------------------------------------------------------------------------------------|--|
| Please choose one of the following answers:                                                                                                                                                                                                                                                                                                                                                                                     |  |
| <b>0 Normal</b><br>I may have some mild symptoms, mainly sensory due to my MS, but they do not limit my activity. When I have an episode, I return to normal as soon as the relapse is over.                                                                                                                                                                                                                                    |  |
| <b>1 Mild disability</b><br>I have some noticeable symptoms due to my MS, but they are minor and have a small impact on my lifestyle.                                                                                                                                                                                                                                                                                           |  |
| <b>2 Moderate disability</b><br>I have no limitations in my ability to walk. However, I have significant problems due to MS that limit daily activities in other ways.                                                                                                                                                                                                                                                          |  |
| <b>3 Walking impairment</b><br>MS affects my activities, especially walking. I can work all day but sporting or physically demanding activities are more difficult than before. Normally I do not need a walking stick or other aids to walk, but I might need some help during a relapse.                                                                                                                                      |  |
| <b>4 Occasional use of a walking aid (walking stick use)</b><br>I use a walking stick, a single crutch or some other form of support (e.g., touching a wall or leaning on someone's arm) to walk all or part of the time, especially when I walk outdoors. I think I can walk 8 metres in 20 seconds without a walking stick or crutch. I always need some help (walking stick or crutch) when I want to walk up to 300 metres. |  |
| <b>5 Walking aid dependency</b><br>To walk 8 metres, I need a walking stick, a crutch or someone to hold on to. I can move around the house or other buildings by holding onto furniture or touching the walls to support myself. I can use a scooter or wheelchair if I want to travel longer distances.                                                                                                                       |  |
| <b>6 Bilateral support</b><br>To walk up to 8 metres, I need two walking sticks or crutches or a rollator. For longer distances I can use a scooter or wheelchair.                                                                                                                                                                                                                                                              |  |
| <b>7 Wheelchair</b><br>My main form of mobility is a wheelchair. I may be able to stand and/or take a step or two, but I cannot walk 8 metres, even with crutches or a rollator.                                                                                                                                                                                                                                                |  |
| <b>8 Bedriddenness</b><br>I cannot sit in a wheelchair for more than an hour.                                                                                                                                                                                                                                                                                                                                                   |  |

## Immunomodulatory treatment

|                                                                 |                  |                                                    |           |
|-----------------------------------------------------------------|------------------|----------------------------------------------------|-----------|
| Are you being or have you been treated with immunotherapeutics? |                  |                                                    |           |
| Yes, currently                                                  | Yes, in the past | Yes, currently and in the past                     | No, never |
| <b>Current immunotherapy</b>                                    |                  |                                                    |           |
| When did you start treatment?                                   |                  | _._ (MM.JJJJ)                                      |           |
| <b>Active substance / preparation:</b>                          |                  |                                                    |           |
| Alemtuzumab / Lemtrada                                          |                  | Azathioprine / Imurek                              |           |
| Cladribine / Mavenclad                                          |                  | Cyclophosphamide / Endoxan                         |           |
| Daclizumab / Zinbryta                                           |                  | Dimethyl fumarate / Tecfidera                      |           |
| Fingolimod / Gilenya                                            |                  | Glatiramer acetate / Clift                         |           |
| Glatiramer acetate / Copaxone                                   |                  | Immunoglobulin / IVIG / Octagam                    |           |
| Interferon beta-1a / Avonex                                     |                  | Interferon beta-1a / Rebif22                       |           |
| Interferon beta-1a / Rebif44                                    |                  | Interferon beta-1b / Betaferon                     |           |
| Interferon beta-1b / Extavia                                    |                  | Methotrexate                                       |           |
| Mitoxantrone / Novatron                                         |                  | Mitoxantrone / Ralenova                            |           |
| Natalizumab / Tysabri                                           |                  | Ocrelizumab / Ocrevus                              |           |
| Ofatumumab / Kesimpta                                           |                  | Ozanimod / Zeposia                                 |           |
| Peginterferon beta-1a / Plegridy                                |                  | Rituximab / MabThera                               |           |
| Siponimod / Mayzent                                             |                  | Steroids - Long-term therapy, longer than 2 months |           |
| Steroids – Pulse therapy                                        |                  | Steroids intrathecal                               |           |
| Teriflunomide / Aubagio                                         |                  | Other: _____                                       |           |

|                                        |                                                    |
|----------------------------------------|----------------------------------------------------|
| <b>Immunotherapy in the past</b>       |                                                    |
| Until when were you treated?           | _._ (MM.JJJJ)                                      |
| <b>Active substance / preparation:</b> |                                                    |
| Alemtuzumab / Lemtrada                 | Azathioprine / Imurek                              |
| Cladribine / Mavenclad                 | Cyclophosphamide / Endoxan                         |
| Daclizumab / Zinbryta                  | Dimethyl fumarate / Tecfidera                      |
| Fingolimod / Gilenya                   | Glatiramer acetate / Clift                         |
| Glatiramer acetate / Copaxone          | Immunoglobulin / IVIG / Octagam                    |
| Interferon beta-1a / Avonex            | Interferon beta-1a / Rebif22                       |
| Interferon beta-1a / Rebif44           | Interferon beta-1b / Betaferon                     |
| Interferon beta-1b / Extavia           | Methotrexate                                       |
| Mitoxantrone / Novatron                | Mitoxantrone / Ralenova                            |
| Natalizumab / Tysabri                  | Ocrelizumab / Ocrevus                              |
| Ofatumumab / Kesimpta                  | Ozanimod / Zeposia                                 |
| Peginterferon beta-1a / Plegridy       | Rituximab / MabThera                               |
| Siponimod / Mayzent                    | Steroids - Long-term therapy, longer than 2 months |
| Steroids – Pulse therapy               | Steroids intrathecal                               |
| Teriflunomide / Aubagio                | Other: _____                                       |

## Comorbidities

|                                            |                     |    |
|--------------------------------------------|---------------------|----|
| Do you suffer from allergies?              | Yes                 | No |
| If yes, what allergies do you suffer from? |                     |    |
| Drug allergy                               | House dust / pollen |    |

|                                                                                         |                                                                                              |
|-----------------------------------------------------------------------------------------|----------------------------------------------------------------------------------------------|
| Food                                                                                    | Nickel / fragrances                                                                          |
| Insect bites                                                                            |                                                                                              |
| Are there other autoimmune diseases?                                                    |                                                                                              |
| <input type="checkbox"/> Thyroid diseases<br>(Hashimoto's thyroiditis, Graves' disease) | <input type="checkbox"/> Psoriasis                                                           |
| <input type="checkbox"/> Chronic polyarthritis (rheumatism)                             | <input type="checkbox"/> Inflammatory bowel disease<br>(Ulcerative colitis, Crohn's disease) |
| <input type="checkbox"/> None                                                           | <input type="checkbox"/> Other: _____                                                        |

### Relapses prior to the SARS-CoV-2 vaccination

|                                                                                                                                                                                                                                                                                                                                                                                                                                                   |                |
|---------------------------------------------------------------------------------------------------------------------------------------------------------------------------------------------------------------------------------------------------------------------------------------------------------------------------------------------------------------------------------------------------------------------------------------------------|----------------|
| Last MS relapse prior to the vaccination:<br>If you do not know the date,<br>please do not provide any information here.                                                                                                                                                                                                                                                                                                                          | ____ (MM.JJJJ) |
| A relapse is characterised by the appearance of new symptoms or the worsening of existing symptoms that last longer than 24 hours. These symptoms can vary greatly and usually develop within a few hours or days. After the relapse, the symptoms may decrease or disappear completely, depending on the course of the disease. To be able to assume that there is another relapse, there must be at least 30 consecutive days between relapses. |                |

### SARS-CoV-2 infections prior to the vaccination

|                                                                                            |                                             |
|--------------------------------------------------------------------------------------------|---------------------------------------------|
| Have you been diagnosed with a SARS-CoV-2 infection before the first vaccination?          |                                             |
| Yes, via a PCR test (nasal/pharyngeal swab with laboratory examination)                    | Yes, via an antigen test (rapid test)       |
| Yes, via an antibody test (blood sample and laboratory examination)                        | Yes, without a confirmed test, but symptoms |
| No                                                                                         |                                             |
| Usually, patients who have already been infected with SARS-CoV-2 are vaccinated only once. |                                             |

### First SARS-CoV-2 vaccine administered

|                                                 |                                                                            |
|-------------------------------------------------|----------------------------------------------------------------------------|
| Comirnaty (BioNTech/Pfizer)                     | Spikevax (Moderna)                                                         |
| Vaxzevria (AstraZeneca)                         | COVID-19 Vaccine Janssen (Janssen-Cilag International)                     |
| Comirnaty (BioNTech/Pfizer) and flu vaccination | Spikevax (Moderna) and flu vaccination                                     |
| Vaxzevria (AstraZeneca) and flu vaccination     | COVID-19 Vaccine Janssen (Janssen-Cilag International) and flu vaccination |

### First vaccination date

|                                                                                                                                                                   |                                        |
|-------------------------------------------------------------------------------------------------------------------------------------------------------------------|----------------------------------------|
| Date:                                                                                                                                                             | ____ (TT.MM.JJJJ)                      |
| <b>Where were you vaccinated?</b>                                                                                                                                 |                                        |
| Vaccination centre                                                                                                                                                | Residential/nursing home (as resident) |
| Medical facility (as an employee)                                                                                                                                 | Medical facility (as a patient)        |
| General practitioner or specialist                                                                                                                                |                                        |
| Has it been confirmed by the vaccination centre / vaccinating institution that you have already survived a SARS-CoV-2 infection and therefore only need one dose? |                                        |
| Yes                                                                                                                                                               | No                                     |

## Vaccination reactions

| Did you experience any vaccination reactions in connection with the first vaccination?           |                                        |
|--------------------------------------------------------------------------------------------------|----------------------------------------|
| Yes                                                                                              | No                                     |
| Please select the information below that applies to you.                                         |                                        |
| <input type="checkbox"/> <b>Emesis / vomitus</b> , occurred after ____ days                      |                                        |
| <input type="radio"/> Subsided after ____ days                                                   | <input type="radio"/> Still persistent |
| <input type="checkbox"/> <b>Rash / exanthema</b> , occurred after ____ days                      |                                        |
| <input type="radio"/> Subsided after ____ days                                                   | <input type="radio"/> Still persistent |
| <input type="checkbox"/> <b>Swollen lymph nodes / lymphadenopathy</b> , occurred after ____ days |                                        |
| <input type="radio"/> Subsided after ____ days                                                   | <input type="radio"/> Still persistent |
| <input type="checkbox"/> <b>Palpitation / tachycardia</b> , occurred after ____ days             |                                        |
| <input type="radio"/> Subsided after ____ days                                                   | <input type="radio"/> Still persistent |
| <input type="checkbox"/> <b>Local reaction</b> , occurred after ____ days                        |                                        |
| <input type="radio"/> Subsided after ____ days                                                   | <input type="radio"/> Still persistent |
| <input type="checkbox"/> <b>Malaise</b> , occurred after ____ days                               |                                        |
| <input type="radio"/> Subsided after ____ days                                                   | <input type="radio"/> Still persistent |
| <input type="checkbox"/> <b>Melalgia / limb pain</b> , occurred after ____ days                  |                                        |
| <input type="radio"/> Subsided after ____ days                                                   | <input type="radio"/> Still persistent |
| <input type="checkbox"/> <b>Nausea</b> , occurred after ____ days                                |                                        |
| <input type="radio"/> Subsided after ____ days                                                   | <input type="radio"/> Still persistent |
| <input type="checkbox"/> <b>Asthenia</b> , occurred after ____ days                              |                                        |
| <input type="radio"/> Subsided after ____ days                                                   | <input type="radio"/> Still persistent |
| <input type="checkbox"/> <b>Vertigo</b> , occurred after ____ days                               |                                        |
| <input type="radio"/> Subsided after ____ days                                                   | <input type="radio"/> Still persistent |
| <input type="checkbox"/> <b>Pain at the injection area</b> , occurred after ____ days            |                                        |
| <input type="radio"/> Subsided after ____ days                                                   | <input type="radio"/> Still persistent |
| <input type="checkbox"/> <b>Muscular pain / myalgia</b> , occurred after ____ days               |                                        |
| <input type="radio"/> Subsided after ____ days                                                   | <input type="radio"/> Still persistent |
| <input type="checkbox"/> <b>Flu-like symptoms</b> , occurred after ____ days                     |                                        |
| <input type="radio"/> Subsided after ____ days                                                   | <input type="radio"/> Still persistent |
| <input type="checkbox"/> <b>Fatigue</b> , occurred after ____ days                               |                                        |
| <input type="radio"/> Subsided after ____ days                                                   | <input type="radio"/> Still persistent |
| <input type="checkbox"/> <b>Ague / undulant fever</b> , occurred after ____ days                 |                                        |
| <input type="radio"/> Subsided after ____ days                                                   | <input type="radio"/> Still persistent |
| <input type="checkbox"/> <b>Headache</b> , occurred after ____ days                              |                                        |
| <input type="radio"/> Subsided after ____ days                                                   | <input type="radio"/> Still persistent |
| <input type="checkbox"/> <b>Fever / pyrexia</b> , occurred after ____ days                       |                                        |
| <input type="radio"/> Subsided after ____ days                                                   | <input type="radio"/> Still persistent |
| <input type="checkbox"/> <b>Other</b> , occurred after ____ days                                 |                                        |
| <input type="radio"/> Subsided after ____ days                                                   | <input type="radio"/> Still persistent |

## New-onset MS symptoms

| Did you experience any new MS symptoms in connection with the first vaccination? |                  |
|----------------------------------------------------------------------------------|------------------|
| Yes                                                                              | No               |
| Please select the information below that applies to you.                         |                  |
| <b>Impaired walking impairment</b> , occurred after ____ days                    | Still persistent |
| Subsided after ____ days                                                         |                  |
| <b>Spasticity</b> , occurred after ____ days                                     | Still persistent |
| Subsided after ____ days                                                         |                  |
| <b>Movement disorders / ataxia / tremor</b> , occurred after ____ days           | Still persistent |
| Subsided after ____ days                                                         |                  |

|                                                                                        |                  |
|----------------------------------------------------------------------------------------|------------------|
| <b>Fatigue</b> , occurred after ____ days                                              | Still persistent |
| Subsided after ____ days                                                               |                  |
| <b>Pain</b> , occurred after ____ days                                                 | Still persistent |
| Subsided after ____ days                                                               |                  |
| <b>Bladder dysfunction / impaired micturition</b> , occurred after ____ days           | Still persistent |
| Subsided after ____ days                                                               |                  |
| <b>Bowel dysfunction / impaired defecation</b> , occurred after ____ days              | Still persistent |
| Subsided after ____ days                                                               |                  |
| <b>Sexual disorders</b> , occurred after ____ days                                     | Still persistent |
| Subsided after ____ days                                                               |                  |
| <b>Cognitive disorders</b> , occurred after ____ days                                  | Still persistent |
| Subsided after ____ days                                                               |                  |
| <b>Depression</b> , occurred after ____ days                                           | Still persistent |
| Subsided after ____ days                                                               |                  |
| <b>Eye movement disorders / oculomotor disorders</b> , occurred after ____ days        | Still persistent |
| Subsided after ____ days                                                               |                  |
| <b>Speaking and voice disorders/ dysarthria / dysphonia</b> , occurred after ____ days | Still persistent |
| Subsided after ____ days                                                               |                  |
| <b>Swallowing disorders / dysphagia</b> , occurred after ____ days                     | Still persistent |
| Subsided after ____ days                                                               |                  |
| <b>Epileptic seizures</b> , occurred after ____ days                                   | Still persistent |
| Subsided after ____ days                                                               |                  |
| <b>Palsy / paresis</b> , occurred after ____ days                                      | Still persistent |
| Subsided after ____ days                                                               |                  |
| <b>Optic nerve inflammation / optic neuritis</b> , occurred after ____ days            | Still persistent |
| Subsided after ____ days                                                               |                  |
| <b>Other seizure-like symptoms / paroxysms</b> , occurred after ____ days              | Still persistent |
| Subsided after ____ days                                                               |                  |

### Worsened MS symptoms

|                                                                                         |                  |
|-----------------------------------------------------------------------------------------|------------------|
| Have you experienced any worsening of MS symptoms in relation to the first vaccination? |                  |
| Yes                                                                                     | No               |
| Please select the information below that applies to you.                                |                  |
| <b>Impaired walking impairment</b> , occurred after ____ days                           | Still persistent |
| Subsided after ____ days                                                                |                  |
| <b>Spasticity</b> , occurred after ____ days                                            | Still persistent |
| Subsided after ____ days                                                                |                  |
| <b>Movement disorders / ataxia / tremor</b> , occurred after ____ days                  | Still persistent |
| Subsided after ____ days                                                                |                  |
| <b>Fatigue</b> , occurred after ____ days                                               | Still persistent |

|                                                                                          |                  |
|------------------------------------------------------------------------------------------|------------------|
| Subsided after _____ days                                                                |                  |
| <b>Pain</b> , occurred after _____ days                                                  | Still persistent |
| Subsided after _____ days                                                                |                  |
| <b>Bladder dysfunction / impaired micturition</b> , occurred after _____ days            | Still persistent |
| Subsided after _____ days                                                                |                  |
| <b>Bowel dysfunction / impaired defecation</b> , occurred after _____ days               | Still persistent |
| Subsided after _____ days                                                                |                  |
| <b>Sexual disorders</b> , occurred after _____ days                                      | Still persistent |
| Subsided after _____ days                                                                |                  |
| <b>Cognitive disorders</b> , occurred after _____ days                                   | Still persistent |
| Subsided after _____ days                                                                |                  |
| <b>Depression</b> , occurred after _____ days                                            | Still persistent |
| Subsided after _____ days                                                                |                  |
| <b>Eye movement disorders / oculomotor disorders</b> , occurred after _____ days         | Still persistent |
| Subsided after _____ days                                                                |                  |
| <b>Speaking and voice disorders / dysarthria / dysphonia</b> , occurred after _____ days | Still persistent |
| Subsided after _____ days                                                                |                  |
| <b>Swallowing disorders / dysphagia</b> , occurred after _____ days                      | Still persistent |
| Subsided after _____ days                                                                |                  |
| <b>Epileptic seizures</b> , occurred after _____ days                                    | Still persistent |
| Subsided after _____ days                                                                |                  |
| <b>Palsy / paresis</b> , occurred after _____ days                                       | Still persistent |
| Subsided after _____ days                                                                |                  |
| <b>Optic nerve inflammation / optic neuritis</b> , occurred after _____ days             | Still persistent |
| Subsided after _____ days                                                                |                  |
| <b>Other seizure-like symptoms / paroxysms</b> , occurred after _____ days               | Still persistent |
| Subsided after _____ days                                                                |                  |

### Relapses following the first vaccination

|                                                                                                                                                                                                                                                                                                                                                                                                                                                          |       |    |
|----------------------------------------------------------------------------------------------------------------------------------------------------------------------------------------------------------------------------------------------------------------------------------------------------------------------------------------------------------------------------------------------------------------------------------------------------------|-------|----|
| Did you experience MS attacks after the first vaccination?                                                                                                                                                                                                                                                                                                                                                                                               | Yes   | No |
| <p>A relapse is characterised by the appearance of new symptoms or the worsening of existing symptoms that last longer than 24 hours. These symptoms can vary greatly and usually develop within a few hours or days. After the relapse, the symptoms may decrease or disappear completely, depending on the course of the disease. To be able to assume that there is another relapse, there must be at least 30 consecutive days between relapses.</p> |       |    |
| If yes:                                                                                                                                                                                                                                                                                                                                                                                                                                                  |       |    |
| How many relapses occurred?                                                                                                                                                                                                                                                                                                                                                                                                                              | _____ |    |
| Have you received a steroid therapy in connection with these MS relapses?                                                                                                                                                                                                                                                                                                                                                                                | Yes   | No |

### SARS-CoV-2 infections following the first vaccination

|                                                                                                                                                                                                                                                                                                    |                            |    |
|----------------------------------------------------------------------------------------------------------------------------------------------------------------------------------------------------------------------------------------------------------------------------------------------------|----------------------------|----|
| Did you have a confirmed SARS-CoV-2 infection after the first vaccination?                                                                                                                                                                                                                         | Yes                        | No |
| If yes:                                                                                                                                                                                                                                                                                            |                            |    |
| Which test was conducted?                                                                                                                                                                                                                                                                          |                            |    |
| PCR test                                                                                                                                                                                                                                                                                           | Antigen Test               |    |
| Antibody test                                                                                                                                                                                                                                                                                      | Unknown                    |    |
| Please indicate the onset of SARS-CoV-2 infection:                                                                                                                                                                                                                                                 | __/__/__ (MM.JJJJ)         |    |
| What symptoms did you experience?                                                                                                                                                                                                                                                                  |                            |    |
| Increased temperature                                                                                                                                                                                                                                                                              | Cough                      |    |
| Lassitude                                                                                                                                                                                                                                                                                          | Joint, bone or muscle pain |    |
| Headache                                                                                                                                                                                                                                                                                           | Sore throat                |    |
| Shortness of breath                                                                                                                                                                                                                                                                                | Blocked nose               |    |
| Chills                                                                                                                                                                                                                                                                                             | Loss of smell or taste     |    |
| Pneumonia                                                                                                                                                                                                                                                                                          | Other: _____               |    |
| For the treatment you were:                                                                                                                                                                                                                                                                        |                            |    |
| Admitted as an inpatient in a hospital                                                                                                                                                                                                                                                             |                            |    |
| Admitted to hospital as an inpatient and treated in intensive care for at least one day.                                                                                                                                                                                                           |                            |    |
| Treated at home.                                                                                                                                                                                                                                                                                   |                            |    |
| If they have been admitted to a hospital:                                                                                                                                                                                                                                                          |                            |    |
| How many days were you admitted to hospital?                                                                                                                                                                                                                                                       | _____                      |    |
| Were you connected to a (ventilated) respirator or did you receive oxygen therapy during your inpatient stay?                                                                                                                                                                                      |                            |    |
| Non-invasive treatment                                                                                                                                                                                                                                                                             | Invasive treatment         |    |
| <u>Non-invasive ventilation:</u> respiratory support or ventilation without invasive ventilation access, for example via a mask placed over the mouth and nose.<br><u>Invasive ventilation:</u> Placement of a breathing tube inserted through the mouth or nose to serve as an artificial airway. |                            |    |
| How many days were you ventilated?                                                                                                                                                                                                                                                                 | _____                      |    |
| Do you still suffer from concomitant symptoms after your SARS-CoV-2 infection?                                                                                                                                                                                                                     | Yes                        | No |
| If so, which symptoms do you still suffer from?                                                                                                                                                                                                                                                    |                            |    |
| Increased temperature                                                                                                                                                                                                                                                                              | Cough                      |    |
| Lassitude                                                                                                                                                                                                                                                                                          | Joint, bone or muscle pain |    |
| Headache                                                                                                                                                                                                                                                                                           | Sore throat                |    |
| Shortness of breath                                                                                                                                                                                                                                                                                | Blocked nose               |    |
| Chills                                                                                                                                                                                                                                                                                             | Loss of smell or taste     |    |
| Pneumonia                                                                                                                                                                                                                                                                                          | Other: _____               |    |
