# Supplementary material for: Frequency and Predictors of Relapses following SARS-CoV-2 Vaccination in Patients with Multiple Sclerosis: Interim Results from a Longitudinal Observational Study
Source: MDPI journal article supplement (doi:10.3390/jcm12113640), 2023-05-24
Supplement: s1 [file s1]

**Supplementary Table S1. Loss of patients across follow-ups**

|                                                                                                            | <b>N</b> |
|------------------------------------------------------------------------------------------------------------|----------|
| <b>Patients at baseline</b>                                                                                | 2661     |
| <b>Loss from the baseline to the 1<sup>st</sup> follow-up</b>                                              | 466      |
| Patients without an invitation (insufficient vaccination interval until the end of the observation period) | 2        |
| Patients with complete vaccination status after the first vaccination with Ad26.COV2.S                     | 22       |
| Patients with only one vaccination after SARS-CoV-2 infections                                             | 66       |
| Patients with SARS-CoV-2 infections after the first vaccination                                            | 4        |
| Patients without specific reasons for non-participation after the baseline survey                          | 372      |
| <b>Loss from the 1<sup>st</sup> to the 2<sup>nd</sup> follow-up</b>                                        | 317      |
| Patients without an invitation (<3 months until the end of the observation period)                         | 112      |
| Patients without specific reasons for non-participation after the 1 <sup>st</sup> follow-up                | 205      |

N – number of patients; SARS-CoV-2 – severe acute respiratory syndrome coronavirus 2.
