# Supplementary material for: Frequency and Predictors of Relapses following SARS-CoV-2 Vaccination in Patients with Multiple Sclerosis: Interim Results from a Longitudinal Observational Study
Source: MDPI journal article supplement (doi:10.3390/jcm12113640), 2023-05-24
Supplement: s1 [file s1]

## **Supplementary Document S7. Generalizability of patient cohort composition**

The cohort of people with multiple sclerosis (PwMS) who participated in this study corresponds to the expected composition of PwMS in Germany regarding socio-demographic and clinical parameters, except for the gender ratio [1,2]. The discrete excess of females in the present study (77.9%) compared with the gender ratio in the German MS Registry (between 71% and 72%), which was known from several studies [1,2], could be due to the current study design (voluntary participation in a structured survey) and has no fundamental impact on the main conclusions. The proportion of patients who reported to receive no disease-modifying drug was also representative as indicated by the analyses of two large German MS patient cohorts [1,3].

### References

1. Flachenecker, P.; Eichstädt, K.; Berger, K.; Ellenberger, D.; Friede, T.; Haas, J.; Kleinschnitz, C.; Pöhlau, D.; Rienhoff, O.; Stahmann, A.; et al. [Multiple sclerosis in Germany: updated analysis of the German MS Registry 2014-2018]. *Fortschr Neurol Psychiatr* **2020**, *88*, 436–450, doi:10.1055/a-1248-5258.
2. Ohle, L.-M.; Ellenberger, D.; Flachenecker, P.; Friede, T.; Haas, J.; Hellwig, K.; Parciak, T.; Warnke, C.; Paul, F.; Zettl, U.K.; et al. Chances and Challenges of a Long-Term Data Repository in Multiple Sclerosis: 20th Birthday of the German MS Registry. *Sci Rep* **2021**, *11*, 13340, doi:10.1038/s41598-021-92722-x.
3. Ellenberger, D.; Gisevius, B.; Motte, J.; Flachenecker, P.; Gold, R.; Haas, J.; Hellwig, K.; Timmesfeld, N.; Wiendl, H.; Zettl, U.K.; et al. MS Treatment Profiles in Germany Insights from Two Major MS Cohorts. ECTRIMS, Amsterdam, Netherlands, October 2021.
