# Supplementary material for: Frequency and Predictors of Relapses following SARS-CoV-2 Vaccination in Patients with Multiple Sclerosis: Interim Results from a Longitudinal Observational Study
Source: MDPI journal article supplement (doi:10.3390/jcm12113640), 2023-05-24
Supplement: s1 [file s1]

## Supplementary Document S3. Second follow-up questionnaire

### SARS-CoV-2 infections following the SARS-CoV-2 vaccination

|                                                                                                                                                                 |                                      |                                       |                |
|-----------------------------------------------------------------------------------------------------------------------------------------------------------------|--------------------------------------|---------------------------------------|----------------|
| For vaccines that require two vaccinations:                                                                                                                     |                                      |                                       |                |
| Did you have a confirmed SARS-CoV-2 infection following the vaccination?                                                                                        | Yes, following the first vaccination | Yes, following the second vaccination | No             |
| For vaccines that require one vaccination:                                                                                                                      |                                      |                                       |                |
| Did you have a confirmed SARS-CoV-2 infection following the vaccination?                                                                                        | Yes                                  | No                                    |                |
| If yes:                                                                                                                                                         |                                      |                                       |                |
| Which test was conducted?                                                                                                                                       |                                      |                                       |                |
| PCR test                                                                                                                                                        |                                      | Antigen Test                          |                |
| Antibody test                                                                                                                                                   |                                      | Unknown                               |                |
| Please indicate the onset of SARS-CoV-2 infection:                                                                                                              |                                      | __/__/__ (MM/JJJJ)                    |                |
| What symptoms did you experience?                                                                                                                               |                                      |                                       |                |
| Increased temperature                                                                                                                                           |                                      | Cough                                 |                |
| Lassitude                                                                                                                                                       |                                      | Joint, bone or muscle pain            |                |
| Headache                                                                                                                                                        |                                      | Sore throat                           |                |
| Shortness of breath                                                                                                                                             |                                      | Blocked nose                          |                |
| Chills                                                                                                                                                          |                                      | Loss of smell or taste                |                |
| Pneumonia                                                                                                                                                       |                                      | Other: _____                          |                |
| For the treatment you were:                                                                                                                                     |                                      |                                       |                |
| Admitted as an inpatient in a hospital                                                                                                                          |                                      |                                       |                |
| Admitted to hospital as an inpatient and treated in intensive care for at least one day.                                                                        |                                      |                                       |                |
| Treated at home.                                                                                                                                                |                                      |                                       |                |
| If they have been admitted to a hospital:                                                                                                                       |                                      |                                       |                |
| How many days were you admitted to hospital?                                                                                                                    |                                      | _____                                 |                |
| Were you connected to a (ventilated) respirator or did you receive oxygen therapy during your inpatient stay?                                                   |                                      |                                       |                |
| Non-invasive treatment                                                                                                                                          |                                      | Invasive treatment                    | No ventilation |
| <b>Non-invasive ventilation:</b> respiratory support or ventilation without invasive ventilation access, for example via a mask placed over the mouth and nose. |                                      |                                       |                |
| <b>Invasive ventilation:</b> Placement of a breathing tube inserted through the mouth or nose to serve as an artificial airway.                                 |                                      |                                       |                |
| How many days were you ventilated?                                                                                                                              |                                      | _____                                 |                |
| Do you still suffer from concomitant symptoms after your SARS-CoV-2 infection?                                                                                  |                                      | Yes                                   | No             |
| If so, which symptoms do you still suffer from?                                                                                                                 |                                      |                                       |                |
| Increased temperature                                                                                                                                           |                                      | Cough                                 |                |
| Lassitude                                                                                                                                                       |                                      | Joint, bone or muscle pain            |                |
| Headache                                                                                                                                                        |                                      | Sore throat                           |                |
| Shortness of breath                                                                                                                                             |                                      | Blocked nose                          |                |
| Chills                                                                                                                                                          |                                      | Loss of smell or taste                |                |
| Pneumonia                                                                                                                                                       |                                      | Other: _____                          |                |

### Antibody test following the vaccination

|                                                    |                          |    |
|----------------------------------------------------|--------------------------|----|
| Did you have an antibody test after a vaccination? |                          |    |
| Yes, antibodies positive                           | Yes, antibodies negative | No |
| If yes:                                            |                          |    |
| Date of your (last) antibody test:                 | __/__/__ (TT/MM/JJJJ)    |    |

## New-onset MS symptoms

|                                                                                         |                  |
|-----------------------------------------------------------------------------------------|------------------|
| Did you experience any new MS symptoms in connection with the last vaccination?         |                  |
| Yes                                                                                     | No               |
| Please select the information below that applies to you.                                |                  |
| <b>Impaired walking impairment</b> , occurred after ____ days                           | Still persistent |
| Subsided after ____ days                                                                |                  |
| <b>Spasticity</b> , occurred after ____ days                                            | Still persistent |
| Subsided after ____ days                                                                |                  |
| <b>Movement disorders / ataxia / tremor</b> , occurred after ____ days                  | Still persistent |
| Subsided after ____ days                                                                |                  |
| <b>Fatigue</b> , occurred after ____ days                                               | Still persistent |
| Subsided after ____ days                                                                |                  |
| <b>Pain</b> , occurred after ____ days                                                  | Still persistent |
| Subsided after ____ days                                                                |                  |
| <b>Bladder dysfunction / impaired micturition</b> , occurred after ____ days            | Still persistent |
| Subsided after ____ days                                                                |                  |
| <b>Bowel dysfunction / impaired defecation</b> , occurred after ____ days               | Still persistent |
| Subsided after ____ days                                                                |                  |
| <b>Sexual disorders</b> , occurred after ____ days                                      | Still persistent |
| Subsided after ____ days                                                                |                  |
| <b>Cognitive disorders</b> , occurred after ____ days                                   | Still persistent |
| Subsided after ____ days                                                                |                  |
| <b>Depression</b> , occurred after ____ days                                            | Still persistent |
| Subsided after ____ days                                                                |                  |
| <b>Eye movement disorders / oculomotor disorders</b> , occurred after ____ days         | Still persistent |
| Subsided after ____ days                                                                |                  |
| <b>Speaking and voice disorders / dysarthria / dysphonia</b> , occurred after ____ days | Still persistent |
| Subsided after ____ days                                                                |                  |
| <b>Swallowing disorders / dysphagia</b> , occurred after ____ days                      | Still persistent |
| Subsided after ____ days                                                                |                  |
| <b>Epileptic seizures</b> , occurred after ____ days                                    | Still persistent |
| Subsided after ____ days                                                                |                  |
| <b>Palsy / paresis</b> , occurred after ____ days                                       | Still persistent |
| Subsided after ____ days                                                                |                  |
| <b>Optic nerve inflammation / optic neuritis</b> , occurred after ____ days             | Still persistent |
| Subsided after ____ days                                                                |                  |
| <b>Other seizure-like symptoms / paroxysms</b> , occurred after ____ days               | Still persistent |
| Subsided after ____ days                                                                |                  |

## Worsened MS symptoms

|                                                                                         |                  |
|-----------------------------------------------------------------------------------------|------------------|
| Have you experienced any worsening of MS symptoms in relation to the last vaccination?  |                  |
| Yes                                                                                     | No               |
| Please select the information below that applies to you.                                |                  |
| <b>Impaired walking impairment</b> , occurred after ____ days                           | Still persistent |
| Subsided after ____ days                                                                |                  |
| <b>Spasticity</b> , occurred after ____ days                                            | Still persistent |
| Subsided after ____ days                                                                |                  |
| <b>Movement disorders / ataxia / tremor</b> , occurred after ____ days                  | Still persistent |
| Subsided after ____ days                                                                |                  |
| <b>Fatigue</b> , occurred after ____ days                                               | Still persistent |
| Subsided after ____ days                                                                |                  |
| <b>Pain</b> , occurred after ____ days                                                  | Still persistent |
| Subsided after ____ days                                                                |                  |
| <b>Bladder dysfunction / impaired micturition</b> , occurred after ____ days            | Still persistent |
| Subsided after ____ days                                                                |                  |
| <b>Bowel dysfunction / impaired defecation</b> , occurred after ____ days               | Still persistent |
| Subsided after ____ days                                                                |                  |
| <b>Sexual disorders</b> , occurred after ____ days                                      | Still persistent |
| Subsided after ____ days                                                                |                  |
| <b>Cognitive disorders</b> , occurred after ____ days                                   | Still persistent |
| Subsided after ____ days                                                                |                  |
| <b>Depression</b> , occurred after ____ days                                            | Still persistent |
| Subsided after ____ days                                                                |                  |
| <b>Eye movement disorders / oculomotor disorders</b> , occurred after ____ days         | Still persistent |
| Subsided after ____ days                                                                |                  |
| <b>Speaking and voice disorders / dysarthria / dysphonia</b> , occurred after ____ days | Still persistent |
| Subsided after ____ days                                                                |                  |
| <b>Swallowing disorders / dysphagia</b> , occurred after ____ days                      | Still persistent |
| Subsided after ____ days                                                                |                  |
| <b>Epileptic seizures</b> , occurred after ____ days                                    | Still persistent |
| Subsided after ____ days                                                                |                  |
| <b>Palsy / paresis</b> , occurred after ____ days                                       | Still persistent |
| Subsided after ____ days                                                                |                  |
| <b>Optic nerve inflammation / optic neuritis</b> , occurred after ____ days             | Still persistent |
| Subsided after ____ days                                                                |                  |
| <b>Other seizure-like symptoms / paroxysms</b> , occurred after ____ days               | Still persistent |
| Subsided after ____ days                                                                |                  |

### Relapses following the last vaccination

|                                                                                                                                                                                                                                                                                                                                                                                                                                                   |     |    |
|---------------------------------------------------------------------------------------------------------------------------------------------------------------------------------------------------------------------------------------------------------------------------------------------------------------------------------------------------------------------------------------------------------------------------------------------------|-----|----|
| Did you experience MS attacks after the last vaccination?                                                                                                                                                                                                                                                                                                                                                                                         | Yes | No |
| A relapse is characterised by the appearance of new symptoms or the worsening of existing symptoms that last longer than 24 hours. These symptoms can vary greatly and usually develop within a few hours or days. After the relapse, the symptoms may decrease or disappear completely, depending on the course of the disease. To be able to assume that there is another relapse, there must be at least 30 consecutive days between relapses. |     |    |
| If yes:                                                                                                                                                                                                                                                                                                                                                                                                                                           |     |    |
| How many relapses occurred?                                                                                                                                                                                                                                                                                                                                                                                                                       |     |    |
| What MS symptoms have you experienced during the relapses?<br>Please select the information below that applies to you.                                                                                                                                                                                                                                                                                                                            |     |    |
| Symptoms experienced:                                                                                                                                                                                                                                                                                                                                                                                                                             |     |    |
| Epileptic seizures                                                                                                                                                                                                                                                                                                                                                                                                                                |     |    |
| Bowel dysfunction/impaired defecation                                                                                                                                                                                                                                                                                                                                                                                                             |     |    |
| Sexual disorders                                                                                                                                                                                                                                                                                                                                                                                                                                  |     |    |
| Swallowing disorders/dysphagia                                                                                                                                                                                                                                                                                                                                                                                                                    |     |    |
| Speaking and voice disorders/dysarthria/dysphonia                                                                                                                                                                                                                                                                                                                                                                                                 |     |    |
| Depression                                                                                                                                                                                                                                                                                                                                                                                                                                        |     |    |
| Optic nerve inflammation/optic neuritis                                                                                                                                                                                                                                                                                                                                                                                                           |     |    |
| Bladder dysfunction/impaired micturition                                                                                                                                                                                                                                                                                                                                                                                                          |     |    |
| Eye movement disorders/oculomotor disorders                                                                                                                                                                                                                                                                                                                                                                                                       |     |    |
| Palsy/paresis                                                                                                                                                                                                                                                                                                                                                                                                                                     |     |    |
| Other seizure-like symptoms/paroxysms                                                                                                                                                                                                                                                                                                                                                                                                             |     |    |
| Movement disorders/ataxia/tremor                                                                                                                                                                                                                                                                                                                                                                                                                  |     |    |
| Cognitive disorders                                                                                                                                                                                                                                                                                                                                                                                                                               |     |    |
| Spasticity                                                                                                                                                                                                                                                                                                                                                                                                                                        |     |    |
| Pain                                                                                                                                                                                                                                                                                                                                                                                                                                              |     |    |
| Impaired walking impairment                                                                                                                                                                                                                                                                                                                                                                                                                       |     |    |
| Fatigue                                                                                                                                                                                                                                                                                                                                                                                                                                           |     |    |
| Have you received a steroid therapy in connection with these MS relapses?                                                                                                                                                                                                                                                                                                                                                                         | Yes | No |
| Was the relapse diagnosed by a doctor?                                                                                                                                                                                                                                                                                                                                                                                                            | Yes | No |

### Patient-determined disease steps (PDDS)

Please read the choices below and choose the one that describes your own situation most appropriately.

This scale focuses mainly on how well you can **walk**.

*You may not find a description that accurately reflects your condition, but please mark the category that describes your situation most closely.*

|                                                                                                                                                                                              |  |
|----------------------------------------------------------------------------------------------------------------------------------------------------------------------------------------------|--|
| Please choose one of the following answers:                                                                                                                                                  |  |
| <b>0 Normal</b><br>I may have some mild symptoms, mainly sensory due to my MS, but they do not limit my activity. When I have an episode, I return to normal as soon as the relapse is over. |  |
| <b>1 Mild disability</b><br>I have some noticeable symptoms due to my MS, but they are minor and have a small impact on my lifestyle.                                                        |  |
| <b>2 Moderate disability</b><br>I have no limitations in my ability to walk. However, I have significant problems due to MS that limit daily activities in other ways.                       |  |

|                                                                                                                                                                                                                                                                                                                                                                                                                                 |  |
|---------------------------------------------------------------------------------------------------------------------------------------------------------------------------------------------------------------------------------------------------------------------------------------------------------------------------------------------------------------------------------------------------------------------------------|--|
| <b>3 Walking impairment</b><br>MS affects my activities, especially walking. I can work all day but sporting or physically demanding activities are more difficult than before. Normally I do not need a walking stick or other aids to walk, but I might need some help during a relapse.                                                                                                                                      |  |
| <b>4 Occasional use of a walking aid (walking stick use)</b><br>I use a walking stick, a single crutch or some other form of support (e.g., touching a wall or leaning on someone's arm) to walk all or part of the time, especially when I walk outdoors. I think I can walk 8 metres in 20 seconds without a walking stick or crutch. I always need some help (walking stick or crutch) when I want to walk up to 300 metres. |  |
| <b>5 Walking aid dependency</b><br>To walk 8 metres, I need a walking stick, a crutch or someone to hold on to. I can move around the house or other buildings by holding onto furniture or touching the walls to support myself. I can use a scooter or wheelchair if I want to travel longer distances.                                                                                                                       |  |
| <b>6 Bilateral support</b><br>To walk up to 8 metres, I need two walking sticks or crutches or a rollator. For longer distances I can use a scooter or wheelchair.                                                                                                                                                                                                                                                              |  |
| <b>7 Wheelchair</b><br>My main form of mobility is a wheelchair. I may be able to stand and/or take a step or two, but I cannot walk 8 metres, even with crutches or a rollator.                                                                                                                                                                                                                                                |  |
| <b>8 Bedriddenness</b><br>I cannot sit in a wheelchair for more than an hour.                                                                                                                                                                                                                                                                                                                                                   |  |
