# Supplementary material for: Frequency and Predictors of Relapses following SARS-CoV-2 Vaccination in Patients with Multiple Sclerosis: Interim Results from a Longitudinal Observational Study
Source: J Clin Med. 2023 May 24;12(11):3640. doi: 10.3390/jcm12113640 (PMC10254005; doi:10.3390/jcm12113640)
Supplement: Supplementary file 1 [file jcm-12-03640-s001.zip]

Archive with 10 entries (10 files):
- REV_Supp Doc S1.pdf
- REV_Supp Doc S2.pdf
- REV_Supp Doc S3.pdf
- REV_Supp Doc S5.pdf
- REV_Supp Doc S6.pdf
- REV_Supp Doc S7.pdf
- REV_Supp Figure S1.pdf
- REV_Supp Table S1.pdf
- REV_Supp Table S2.pdf
- REV_Supp Table S3.pdf
